# Supplementary material for: Within-Day Variability of SARS-CoV-2 RNA in Municipal Wastewater Influent During Periods of Varying COVID-19 Prevalence and Positivity
Source: bioRxiv or medRxiv preprint supplement (doi:10.1101/2021.03.16.21253652), 2021-03-24
Supplement: Supplementary file [file media-1.pdf]

1 **Supporting Information: Within-Day Variability of SARS-CoV-2 RNA in Municipal**  
2 **Wastewater Influent During Periods of Varying COVID-19 Prevalence**

3 Aaron Bivins<sup>1,2</sup>, Devin North<sup>1</sup>, Zhenyu Wu<sup>1</sup>, Marlee Shaffer<sup>1</sup>, Warish Ahmed<sup>3</sup>, Kyle Bibby<sup>1,2\*</sup>

4 <sup>1</sup> Department of Civil & Environmental Engineering & Earth Sciences, University of Notre Dame,  
5 156 Fitzpatrick Hall, Notre Dame, IN 46556

6 <sup>2</sup> Environmental Change Initiative, University of Notre Dame, 721 Flanner Hall, Notre Dame, IN  
7 46556

8 <sup>3</sup> CSIRO Land and Water, Ecosciences Precinct, 41 Boggo Road, Qld 4102, Australia

9 \*kbibby@nd.edu

10 17 pages, 2 tables, 15 figures

11 Table S1: RT-ddPCR assays

12 Figure S1: Process control recovery efficiency

13 Figure S2: Extraction and molecular control recovery efficiency

14 Figure S3: SARS-CoV-2 RNA concentration recovery efficiency

15 Figure S4: PMMoV RNA concentration recovery efficiency

16 Figure S5: RNA copy number persistence in primary influent at 4°C and 25°C

17 Figure S6: RNA copy number measurements before and after pasteurization

18 Figure S7: RNA copy number measurements following freeze-thaw cycles

19 Figure S8: RT-ddPCR N1 assay 95% limit of detection

20 Figure S9: COVID-19 clinical data from county containing WWTP A

21 Figure S10: COVID-19 clinical data from county containing WWTP B

22 Figure S11: WWTP A primary influent flow, PMMoV concentration, and recovery efficiency

23 Figure S12: WWTP B primary influent flow, PMMoV concentration, and recovery efficiency

24 Table S2: Summary statistics for primary influent flow parameters

25 Figure S13: WWTP A primary influent SARS-CoV-2 RNA load and PMMoV-normalized

26 Figure S14: WWTP B primary influent SARS-CoV-2 RNA load and PMMoV RNA-normalized

27 Figure S15: Primary influent SARS-CoV-2 RNA N1 concentration versus COVID-19 clinical data

28

29 Table S1 | RT-ddPCR assays used to detect and quantify SARS-CoV-2 RNA, PMMoV RNA, and BRSV RNA in primary influent  
 30 wastewater samples. The assay used to quantify the extraction and molecular control Hep G armored RNA is also summarized.

| Virus                                              | Gene Target           |   | Sequences                                                     | RT-ddPCR Reaction Concentration | Thermal Cycling Conditions                                                            |
|----------------------------------------------------|-----------------------|---|---------------------------------------------------------------|---------------------------------|---------------------------------------------------------------------------------------|
| SARS-CoV-2                                         | N1                    | F | 5'-GAC CCC AAA ATC AGC GAA AT-3'                              | 1000 nM                         | 50°C 60 min; 95°C 10 min;<br>40 Cycles: 95°C 30 s, 59°C 60 s<br>98°C 10 min; 4°C hold |
|                                                    |                       | R | 5'-TCT GGT TAC TGC CAG TTG AAT CTG-3'                         | 1000 nM                         |                                                                                       |
|                                                    |                       | P | 5'-FAM-ACC CCG CAT TAC GTT TGG TGG ACC-BHQ1-3'                | 250 nM                          |                                                                                       |
| PMMoV<br>(fecal indicator virus)                   | replicase protein     | F | 5'-GAG TGG TTT GAC CTT AAC GTT TGA-3'                         | 900 nM                          |                                                                                       |
|                                                    |                       | R | 5'-TTG TCG GTT GCA ATG CAA GT-3'                              | 900 nM                          |                                                                                       |
|                                                    |                       | P | 5'-FAM-CCT ACC GAA GCA AAT G-MGBNFQ-3'                        | 250 nM                          |                                                                                       |
| BRSV<br>(process control)                          | nucleoprotein         | F | 5'-GCA ATG CTG CAG GAC TAG GTA TAA T-3'                       | 900 nM                          |                                                                                       |
|                                                    |                       | R | 5'-ACA CTG TAA TTG ATG ACC CCA TTC T-3'                       | 900 nM                          |                                                                                       |
|                                                    |                       | P | 5'-HEX-AC CAA GAC T/ZEN/T GTA TGA TGC TGC CAA AGC A-IABkFQ-3' | 250 nM                          |                                                                                       |
| Hep G Armored RNA (extraction & molecular control) | polyprotein precursor | F | 5'-CGG CCA AAA GGT GGT GGA TG-3'                              | 900 nM                          |                                                                                       |
|                                                    |                       | R | 5'-CCC GAC GTC AGG CTC GTC G-3'                               | 900 nM                          |                                                                                       |
|                                                    |                       | P | 5'-FAM-AG GTC CCT C/ZEN/T GGC GCT TGT GGC GAG-IABkFQ-3'       | 250 nM                          |                                                                                       |

31  
 32  
 33  
 34  
 35  
 36  
 37  
 38  
 39  
 40  
 41

42 Table S2 | Summary statistics for each parameter measured during 24-hour primary influent sampling at WWTP A and B. Summary  
 43 statistics are also shown for various transformations of the primary influent SARS-CoV-2 RNA counts.

|                | Flow<br>(MGD) | BRSV<br>Recovery<br>(%) | PMMoV RNA<br>(CN per L) | SARS-CoV-2<br>RNA<br>(CN per L) | Recovery<br>Adjusted SARS-<br>CoV-2 RNA<br>(N1 CN per L) | SARS-CoV-2<br>RNA Load<br>(N1 CN per day) | Recovery<br>Adjusted SARS-<br>CoV-2 RNA<br>Load<br>(N1 CN per day) | SARS-CoV-2<br>RNA/PMMoV<br>RNA Ratio<br>(log10 N1 CN<br>per L / log10 CN<br>per L) |
|----------------|---------------|-------------------------|-------------------------|---------------------------------|----------------------------------------------------------|-------------------------------------------|--------------------------------------------------------------------|------------------------------------------------------------------------------------|
| WWTP A 6-18&19 |               |                         |                         |                                 |                                                          |                                           |                                                                    |                                                                                    |
| $\bar{x}$      | 15.1          | 1.89                    | 7.64x10 <sup>6</sup>    | 1.21x10 <sup>3</sup>            | 3.08x10 <sup>5</sup>                                     | 7.04x10 <sup>10</sup>                     | 1.84x10 <sup>13</sup>                                              | 0.430                                                                              |
| s              | 1.55          | 3.90                    | 5.16x10 <sup>6</sup>    | 1.22x10 <sup>3</sup>            | 3.42x10 <sup>5</sup>                                     | 7.35x10 <sup>10</sup>                     | 2.09x10 <sup>13</sup>                                              | 0.057                                                                              |
| 25th           | 14.8          | 0.200                   | 3.95x10 <sup>6</sup>    | 509                             | 3.69x10 <sup>4</sup>                                     | 2.96x10 <sup>10</sup>                     | 2.09x10 <sup>12</sup>                                              | 0.383                                                                              |
| 50th           | 15.7          | 0.560                   | 6.45x10 <sup>6</sup>    | 667                             | 1.49x10 <sup>5</sup>                                     | 3.69x10 <sup>10</sup>                     | 9.19x10 <sup>12</sup>                                              | 0.418                                                                              |
| 75th           | 16.2          | 1.70                    | 8.78x10 <sup>6</sup>    | 1490                            | 5.36x10 <sup>5</sup>                                     | 8.35x10 <sup>10</sup>                     | 3.24x10 <sup>13</sup>                                              | 0.452                                                                              |
| CoV (%)        | 10.2          | 206                     | 67.5                    | 100                             | 111                                                      | 104                                       | 113                                                                | 13.3                                                                               |
| WWTP A 12-2    |               |                         |                         |                                 |                                                          |                                           |                                                                    |                                                                                    |
| $\bar{x}$      | 14.8          | 0.913                   | 7.91x10 <sup>6</sup>    | 5.82x10 <sup>3</sup>            | 3.13x10 <sup>6</sup>                                     | 3.19x10 <sup>11</sup>                     | 1.75x10 <sup>14</sup>                                              | 0.536                                                                              |
| s              | 1.18          | 1.49                    | 3.59x10 <sup>6</sup>    | 4.08x10 <sup>3</sup>            | 2.85x10 <sup>6</sup>                                     | 2.05x10 <sup>11</sup>                     | 1.50x10 <sup>14</sup>                                              | 0.041                                                                              |
| 25th           | 13.8          | 0.075                   | 6.22x10 <sup>6</sup>    | 2.95x10 <sup>3</sup>            | 7.00x10 <sup>5</sup>                                     | 1.67x10 <sup>11</sup>                     | 4.14x10 <sup>13</sup>                                              | 0.504                                                                              |
| 50th           | 15.2          | 0.15                    | 6.77x10 <sup>6</sup>    | 4.47x10 <sup>3</sup>            | 2.84x10 <sup>6</sup>                                     | 2.51x10 <sup>11</sup>                     | 1.60x10 <sup>14</sup>                                              | 0.530                                                                              |
| 75th           | 15.9          | 1.40                    | 10.18x10 <sup>6</sup>   | 8.70x10 <sup>3</sup>            | 4.94x10 <sup>6</sup>                                     | 4.76x10 <sup>11</sup>                     | 2.99x10 <sup>14</sup>                                              | 0.576                                                                              |
| CoV (%)        | 7.97          | 164                     | 45.4                    | 70                              | 90.8                                                     | 64.3                                      | 85.7                                                               | 7.70                                                                               |
| WWTP B 5-7&8** |               |                         |                         |                                 |                                                          |                                           |                                                                    |                                                                                    |
| $\bar{x}$      | 8.46          | 0.332                   | 1.13x10 <sup>7</sup>    | 213                             | 8.56x10 <sup>4</sup>                                     | 6.87x10 <sup>9</sup>                      | 2.72x10 <sup>12</sup>                                              | 0.326                                                                              |
| s              | 1.16          | 0.169                   | 3.95x10 <sup>6</sup>    | 34.6                            | 6.49x10 <sup>4</sup>                                     | 1.11x10 <sup>9</sup>                      | 1.85x10 <sup>12</sup>                                              | 0.013                                                                              |
| 25th           | 7.68          | 0.185                   | 7.10x10 <sup>6</sup>    | 184                             | 4.41x10 <sup>4</sup>                                     | 6.06x10 <sup>9</sup>                      | 1.46x10 <sup>12</sup>                                              | 0.316                                                                              |
| 50th           | 8.35          | 0.345                   | 1.21x10 <sup>7</sup>    | 216                             | 6.26x10 <sup>4</sup>                                     | 6.48x10 <sup>9</sup>                      | 1.99x10 <sup>12</sup>                                              | 0.326                                                                              |
| 75th           | 9.47          | 0.493                   | 1.47x10 <sup>7</sup>    | 244                             | 1.20x10 <sup>5</sup>                                     | 8.20x10 <sup>9</sup>                      | 4.14x10 <sup>12</sup>                                              | 0.338                                                                              |
| CoV (%)        | 13.7          | 50.9                    | 34.9                    | 16.2                            | 75.9                                                     | 16.3                                      | 68.1                                                               | 3.96                                                                               |
| WWTP B 12-1&2  |               |                         |                         |                                 |                                                          |                                           |                                                                    |                                                                                    |
| $\bar{x}$      | 7.98          | 0.224                   | 4.29x10 <sup>6</sup>    | 1.51x10 <sup>3</sup>            | 1.65x10 <sup>6</sup>                                     | 4.58x10 <sup>10</sup>                     | 5.37x10 <sup>13</sup>                                              | 0.465                                                                              |
| s              | 1.37          | 0.274                   | 1.52x10 <sup>6</sup>    | 1.07x10 <sup>3</sup>            | 1.66x10 <sup>6</sup>                                     | 3.50x10 <sup>10</sup>                     | 5.62x10 <sup>13</sup>                                              | 0.035                                                                              |
| 25th           | 6.55          | 0.060                   | 2.71x10 <sup>6</sup>    | 720                             | 3.73x10 <sup>5</sup>                                     | 2.17x10 <sup>10</sup>                     | 1.09x10 <sup>13</sup>                                              | 0.431                                                                              |
| 50th           | 8.65          | 0.100                   | 4.53x10 <sup>6</sup>    | 1.28x10 <sup>3</sup>            | 1.16x10 <sup>6</sup>                                     | 3.23x10 <sup>10</sup>                     | 3.40x10 <sup>13</sup>                                              | 0.459                                                                              |
| 75th           | 9.01          | 0.360                   | 5.29x10 <sup>6</sup>    | 2.08x10 <sup>3</sup>            | 2.69x10 <sup>6</sup>                                     | 5.73x10 <sup>10</sup>                     | 9.13x10 <sup>13</sup>                                              | 0.500                                                                              |
| CoV (%)        | 17.1          | 122                     | 35.5                    | 70.5                            | 100                                                      | 76.4                                      | 105                                                                | 7.53                                                                               |

44 \*\*SARS-CoV-2 RNA was only detected in 6 of 12 grab samples; non-detects were excluded from summary statistics calculati

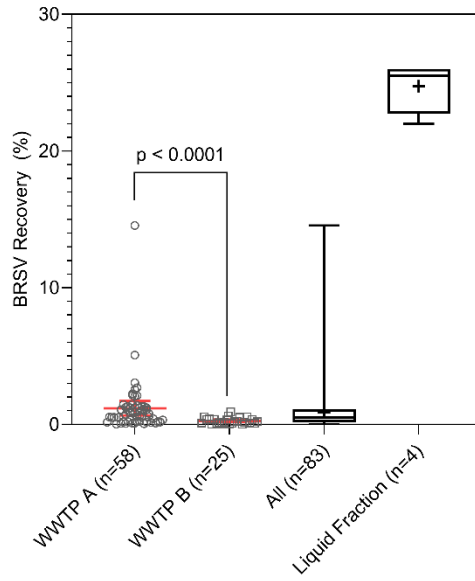

46

47 Figure S1 | Process control (BRSV) recovery efficiency for primary influent samples concentrated  
 48 by adsorption direct-extraction from WWTP A (individual data points, mean and standard  
 49 deviation), WWTP B (same), and pooled for all primary influent samples. Recovery efficiency for  
 50 a subset of four primary influent samples concentrated after the suspended solids were removed  
 51 by centrifugation is also shown. Box plots display minimum, maximum, interquartile range,  
 52 median, and mean (+). The recovery efficiency from WWTP A was greater than WWTP B ( $p <$   
 53 0.0001).

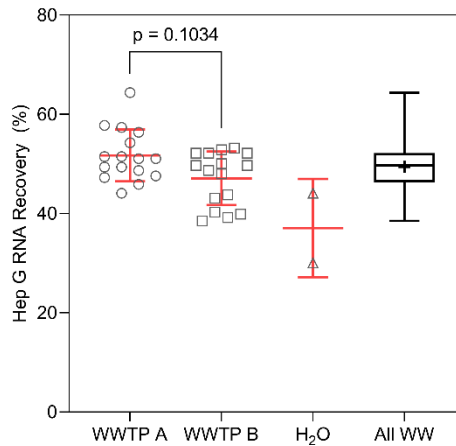

54

55 Figure S2 | Recovery efficiency of the HepG extraction and molecular control for primary influent  
 56 samples concentrated by adsorption direct-extraction from WWTP A (n=16), WWTP B (n=16),  
 57 PCR-grade water (n=2), and a pooled boxplot of all primary influent samples. Plots for each  
 58 WWTP and for H<sub>2</sub>O display individual data points, mean, and standard deviation. The box plot  
 59 displays the minimum, maximum, interquartile range, median, and mean (+). There was no  
 60 difference in the recovery efficiency of the HepG control between primary influent extracts from  
 61 WWTP A and B ( $p = 0.1034$ ).

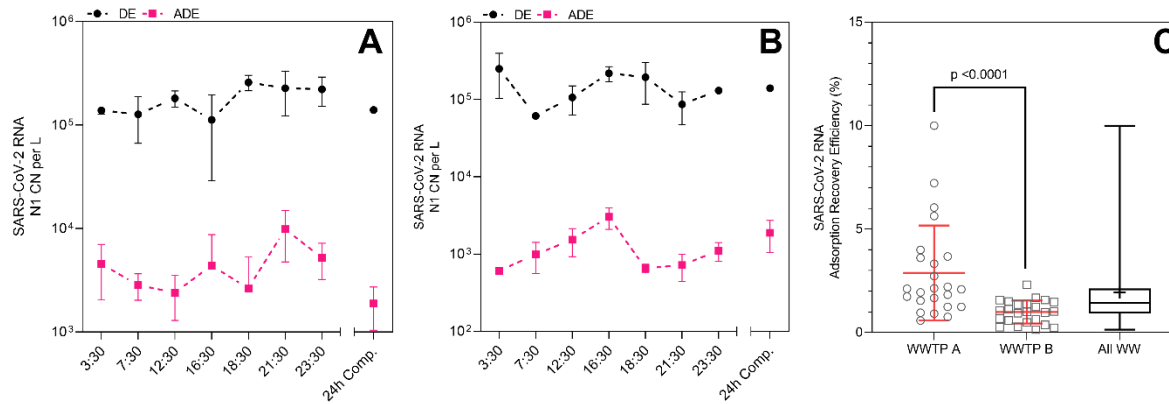

62

63 Figure S3 | The mean and standard deviation of SARS-CoV-2 RNA N1 copy number (CN) per liter as measured via direct extraction  
 64 (DE) of primary influent versus adsorption followed by extraction (ADE) at WWTP A (A) and WWTP B (B) during the 24-  
 65 hour sampling in December 2020. The SARS-CoV-2 RNA adsorption recovery efficiency was estimated for each WWTP (C) with  
 66 individual RT-ddPCR data points, mean, and standard deviation at each WWTP shown and a boxplot displaying the minimum,  
 67 maximum, interquartile range, median, and mean (+) across all RT-ddPCR replicates. SARS-CoV-2 RNA concentration recovery  
 68 efficiency was significantly greater at WWTP A than WWTP B ( $p < 0.0001$ ).

69

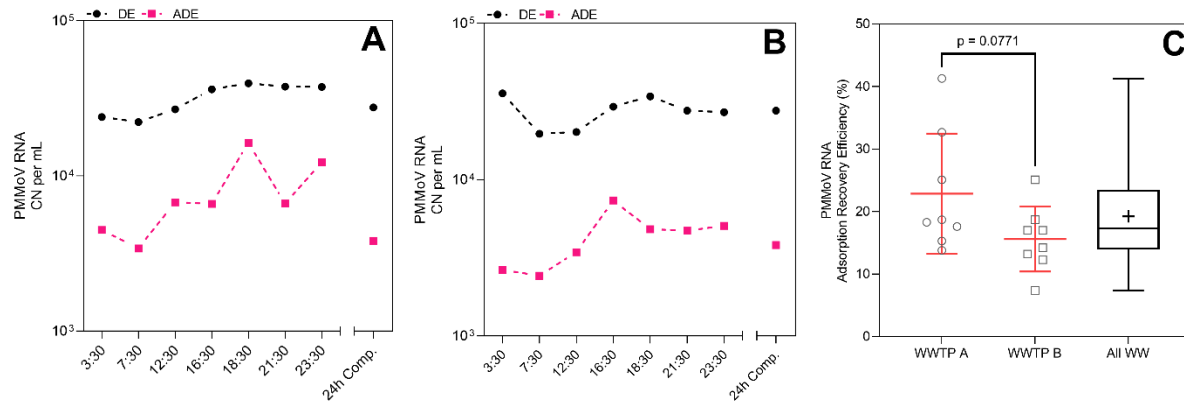

70

71 Figure S4 | Mean PMMoV RNA copy number (CN) per milliliter as measured via direct extraction (DE) of influent versus adsorption  
 72 concentration followed by direct extraction (ADE) at WWTP A (A) and WWTP B (B) during the 24-hour influent sampling in December  
 73 2020. The mean and standard deviation of PMMoV RNA adsorption recovery was estimated for each WWTP (C) with individual RT-  
 74 ddPCR data points, mean, and standard deviation at each WWTP shown and a boxplot displaying the minimum, maximum, interquartile  
 75 range, median, and mean (+) across all RT-ddPCR replicates. PMMoV RNA concentration recovery efficiency was similar ( $p = 0.0771$ )  
 76 between the two WWTPs.

77

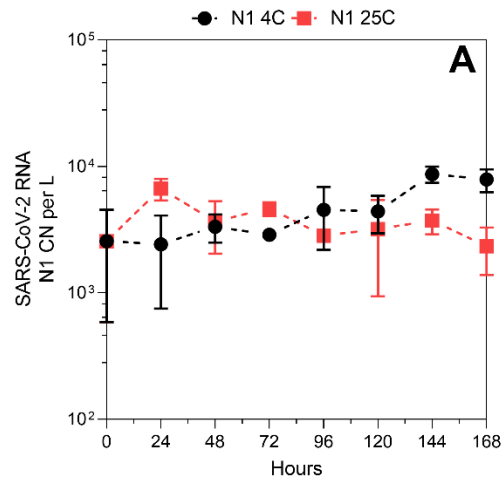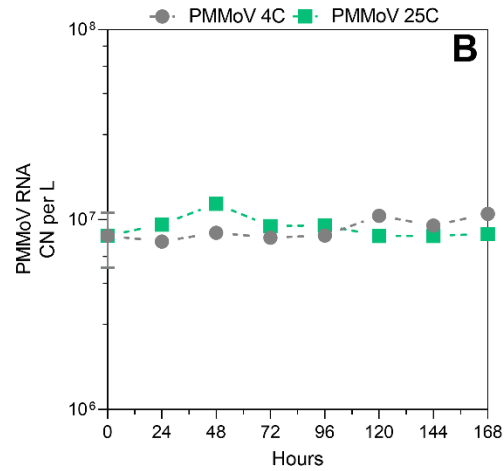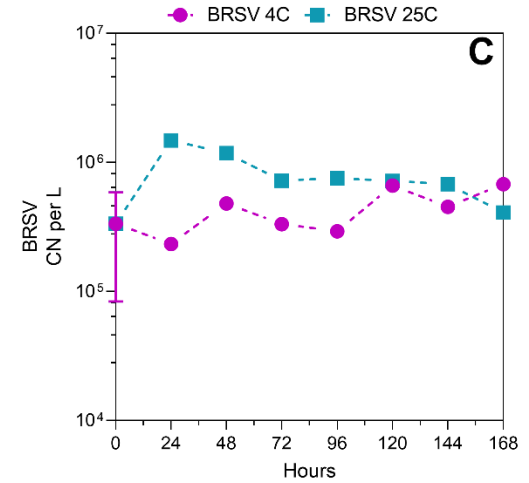

78

79 Figure S5 | SARS-CoV-2 RNA N1 copy number (CN) per liter (A), PMMoV RNA CN per liter (B), and BRSV RNA CN per liter (C)  
 80 enumerated every 24 hours over 7 days (168 hours) of incubation at 4°C and 25°C in primary influent from WWTP A. Plots display  
 81 mean and standard deviation (where possible).

82

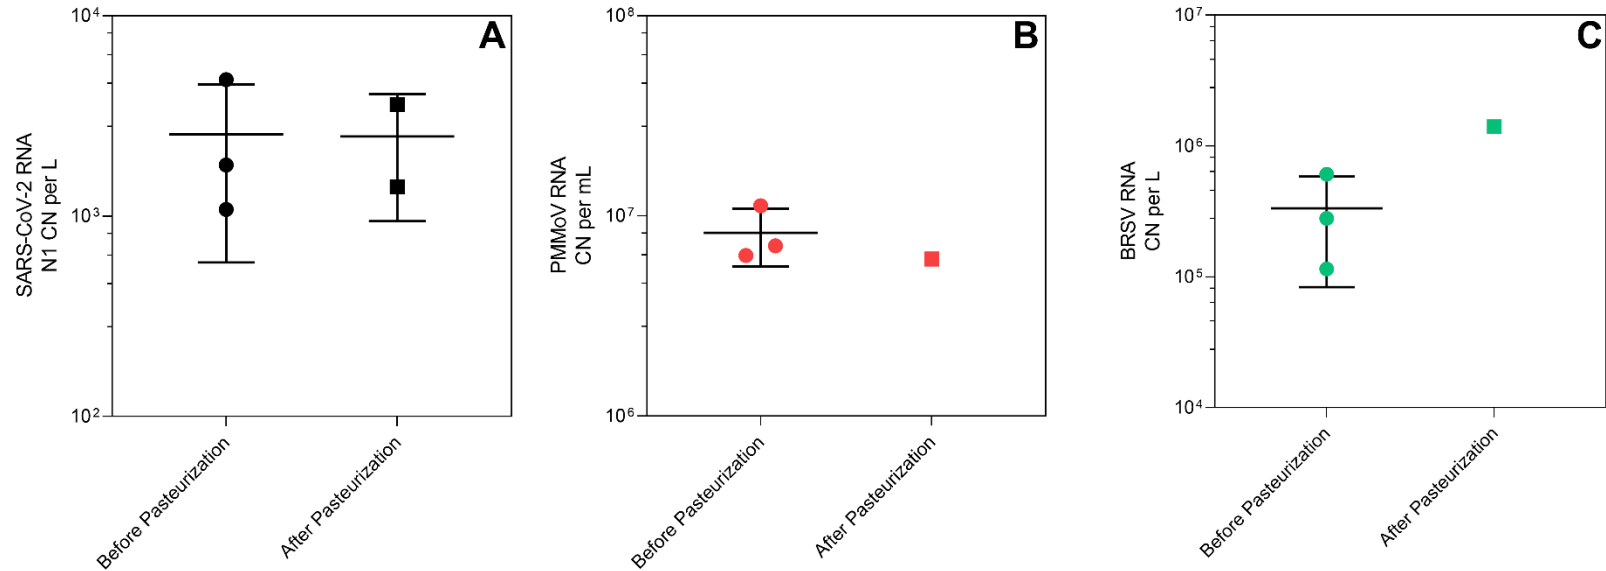

83

84 Figure S6 | Measurements of SARS-CoV-2 RNA N1 CN per liter (A), PMMoV RNA CN per liter (B), and BRSV RNA CN per liter (C)  
 85 before and after pasteurization for 90 minutes at 60°C in primary influent from WWTP A. Plots display individual replicate  
 86 measurements, mean, and standard deviation (where available).

87



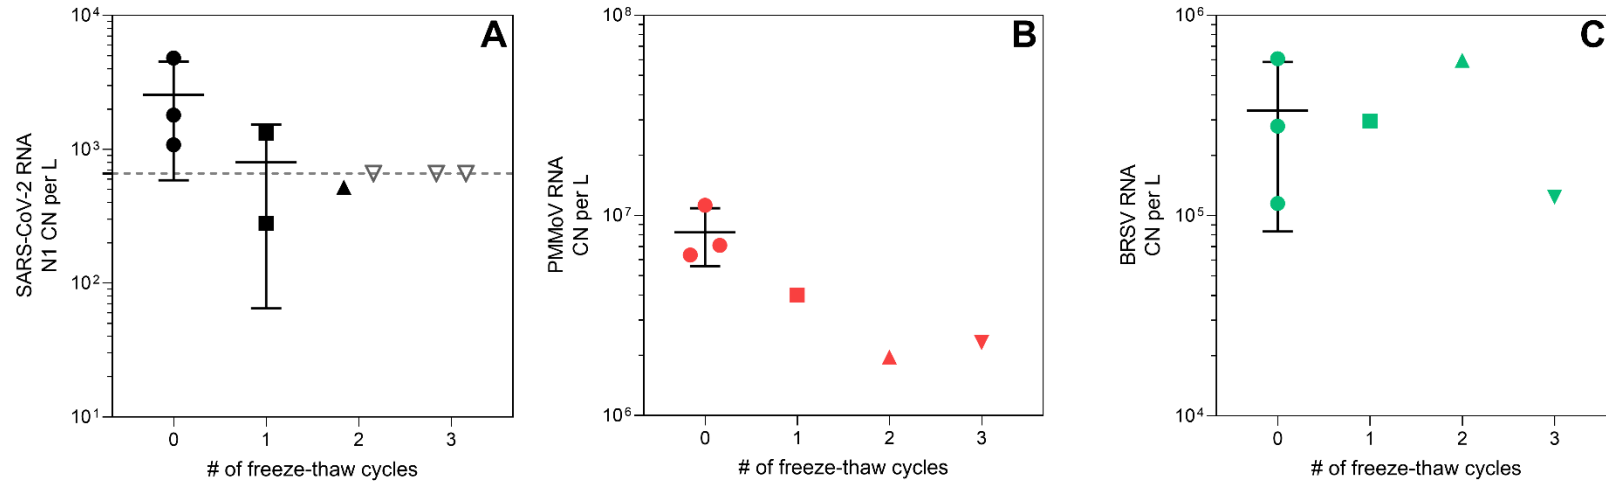

88

89 Figure S7 | Measurements of SARS-CoV-2 RNA N1 CN per liter (A), PMMoV RNA CN per liter (B), and BRSV RNA CN per liter (C)  
 90 following sequential freeze-thaw cycles of primary influent from WWTP A. Plots display individual replicate measurements, mean, and  
 91 standard deviation (where available).

92

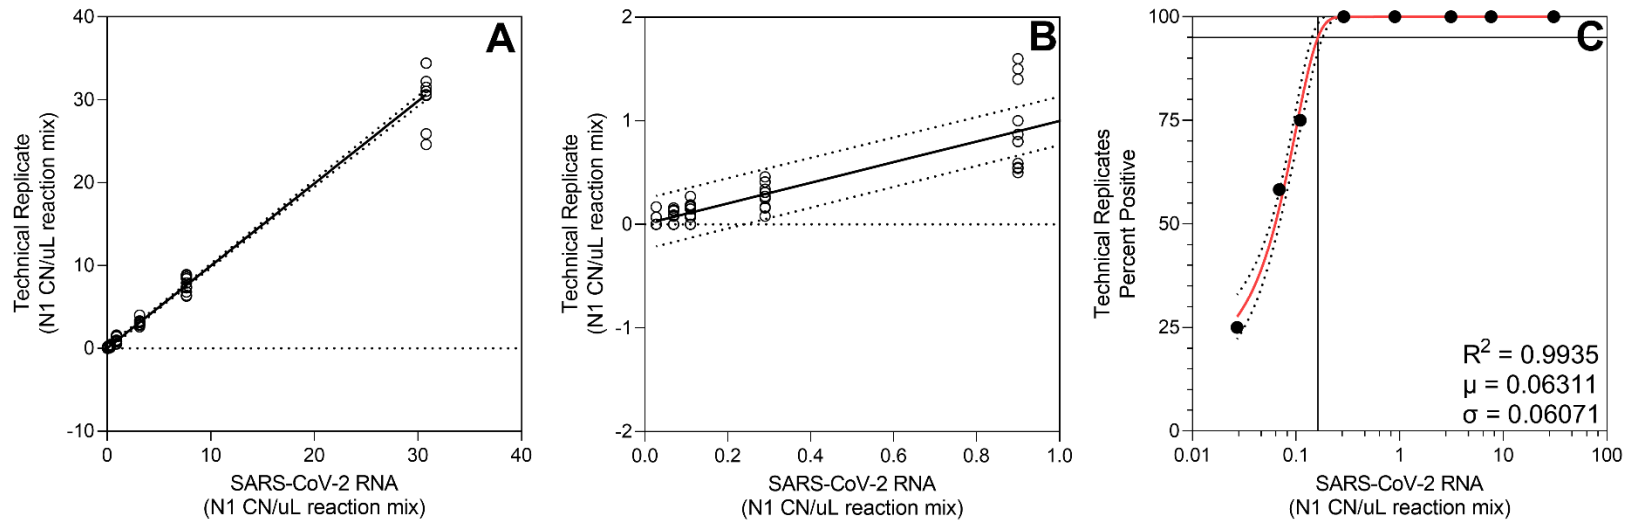

93

94 Figure S8 | Quantification of SARS-CoV-2 RNA N1 copy numbers in RT-ddPCR technical replicates along a 1:3 dilution series of RNA  
 95 positive control material (A,B). A Gaussian distribution fit to the proportion of positive technical replicates along the dilution series (C)  
 96 and used to estimate the N1 95% LOD of 3.3 copies (95% CI: 2.8 – 3.8) per RT-ddPCR reaction.

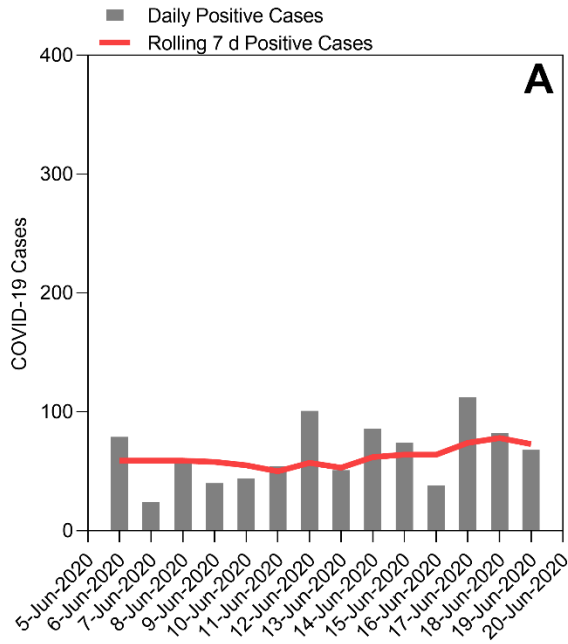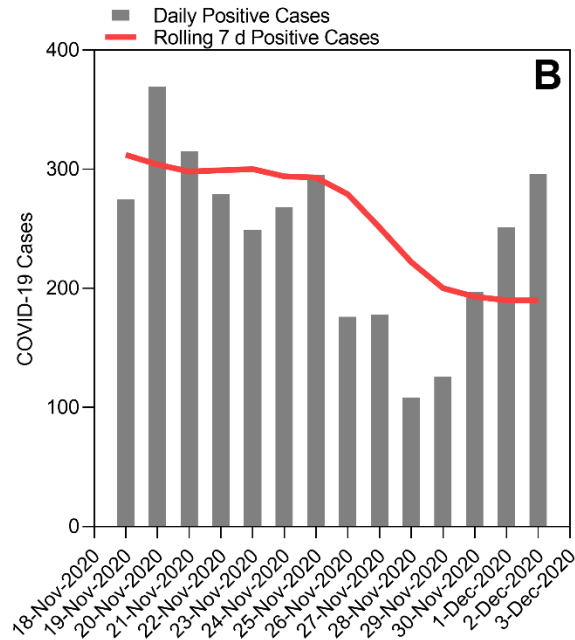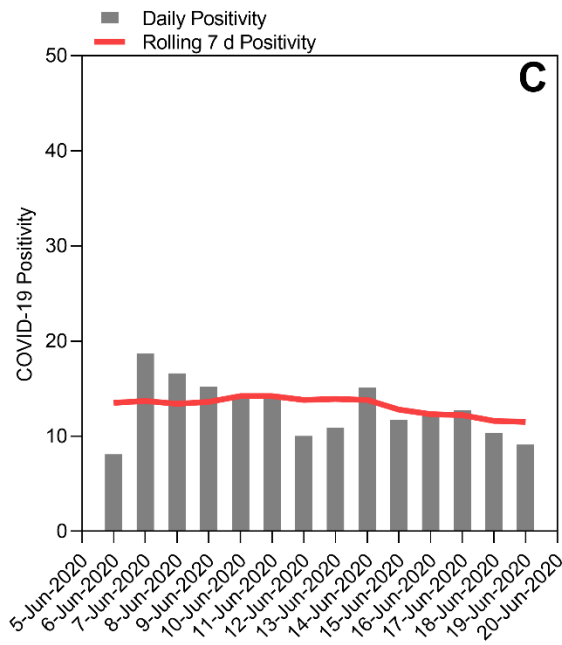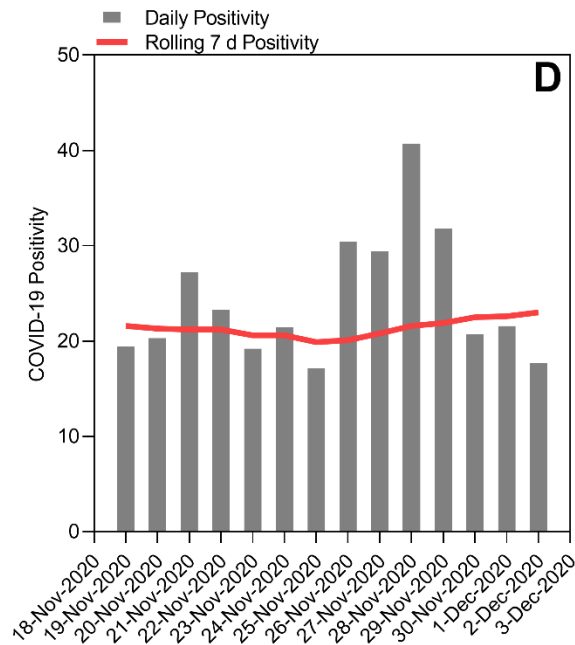

97

98 Figure S9 | Daily new cases, positivity, and their associated 7-day rolling averages for COVID-19  
 99 in the county containing WWTP A during the two weeks immediately prior to 24-hour influent  
 100 sampling on June 18 and 19, 2020 (A & C) and December 2, 2020 (B & D).

101

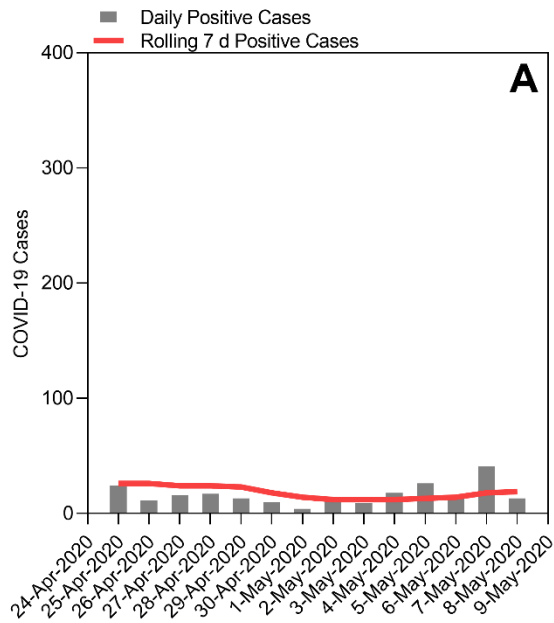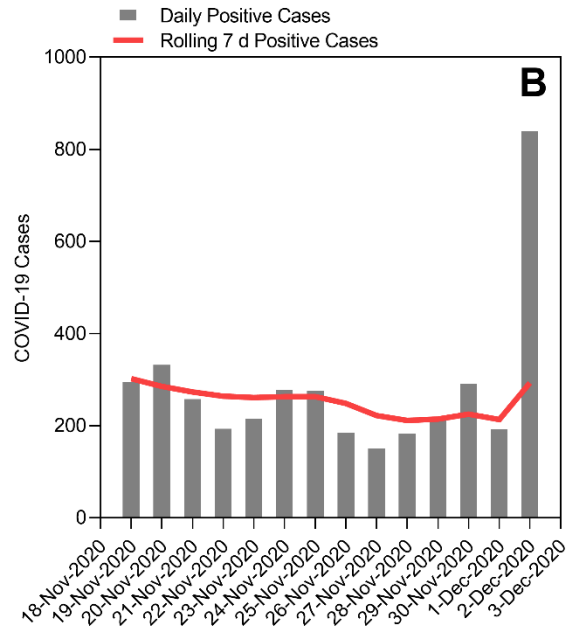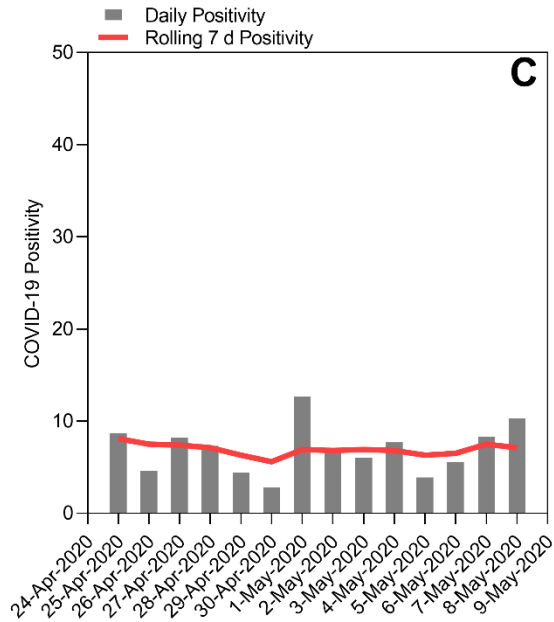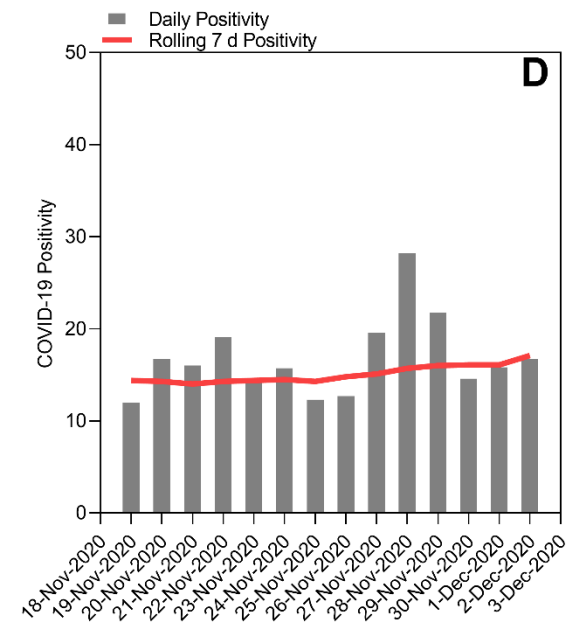

102

103 Figure S10 | Daily new cases, positivity, and their associated 7-day rolling averages for COVID-  
 104 19 in the county containing WWTP B during the two weeks immediately prior to 24-hour influent  
 105 sampling on May 8 and 19, 2020 (A & C) and December 1 and 2, 2020 (B & D).

106

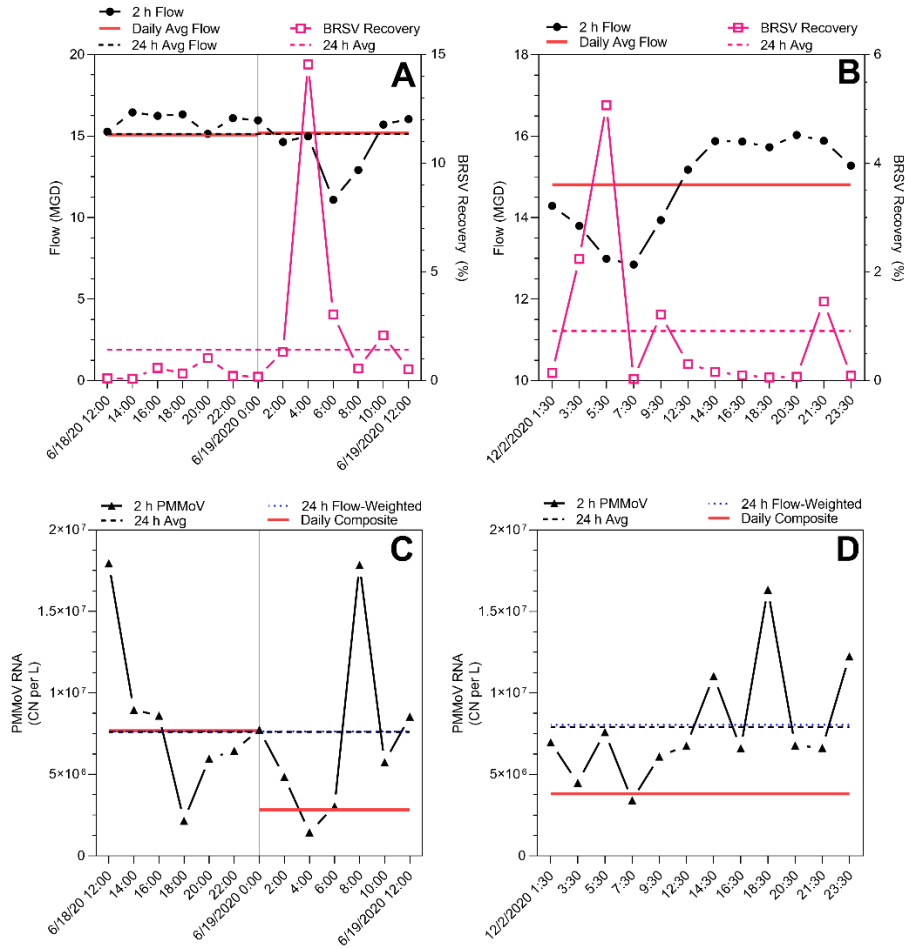

107

108 Figure S11 | WWTP A primary influent characteristics as observed during two 24-hour sampling  
 109 events: influent flow rates and process control recovery efficiency (A & B), and PMMoV RNA copy  
 110 number density (C & D). Data displayed include the observations in serial grab samples, the  
 111 average observed over the 24-hour interval, the flow-weighted 24-hour average, and the daily  
 112 composite sample observation (when available).

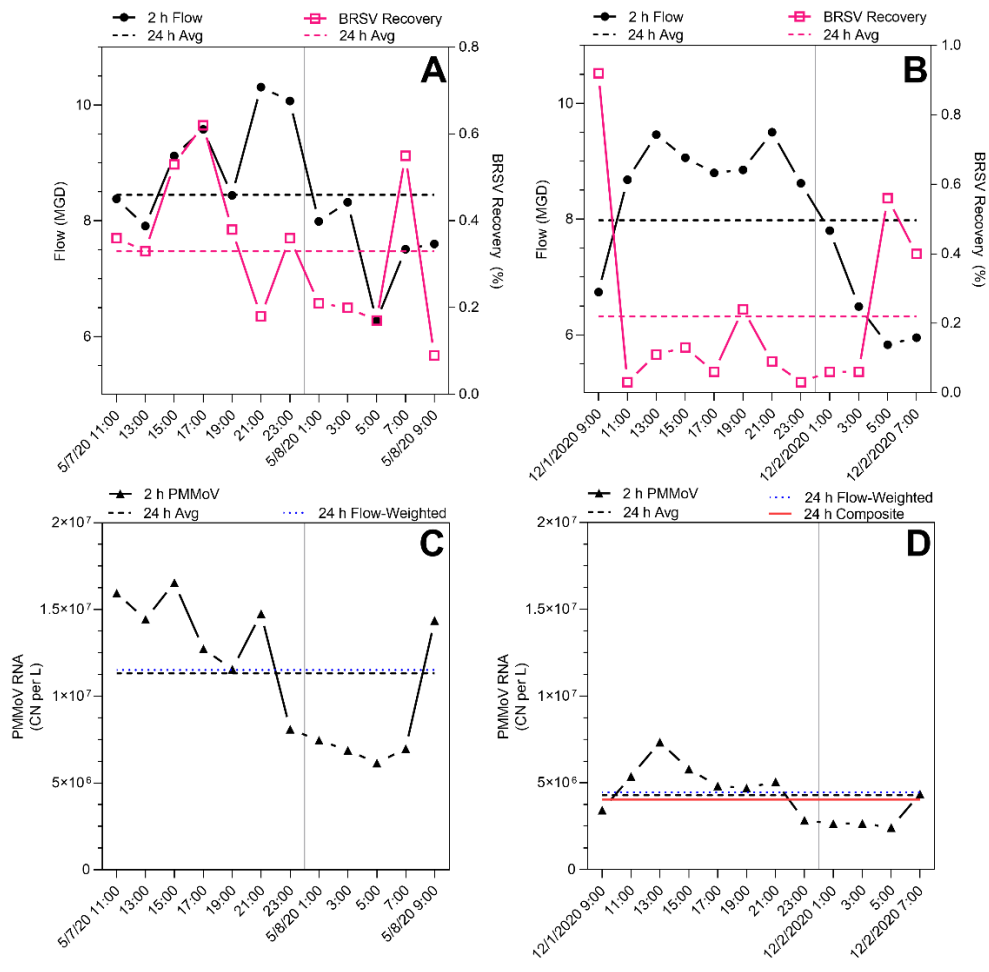

113

114 Figure S12 | WWTP B primary influent characteristics as observed during two 24-hour sampling  
 115 events: influent flow rates and process control recovery efficiency (A & B), and PMMoV RNA copy  
 116 number density (C & D). Data displayed include the observations in serial grab samples, the  
 117 average observed over the 24-hour interval, the flow-weighted 24-hour average, and the daily  
 118 composite sample observation (when available).

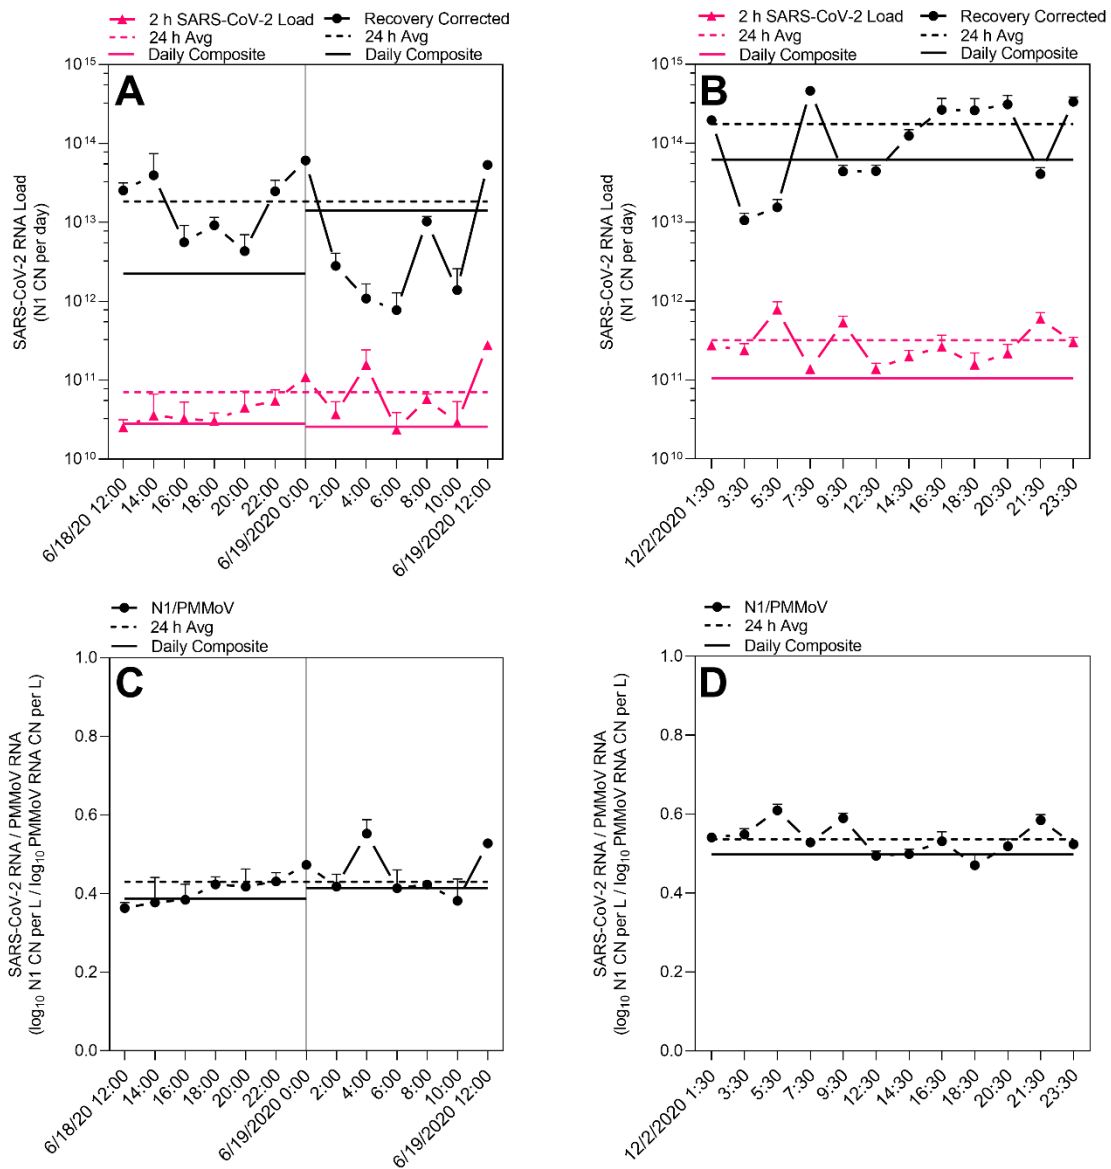

119

120 Figure S13 | WWTP A primary influent characteristics as measured during two 24-hour sampling  
 121 events: influent SARS-CoV-2 loading, copy number (CN) per day (concentration x flow), with and  
 122 without recovery adjustment (A & B), and the ratio of the  $\log_{10}$  SARS-CoV-2 RNA copy number  
 123 per liter to  $\log_{10}$  PMMoV RNA copy number per liter (C & D). Data displayed include the  
 124 observations in serial grab samples, the average observed over the 24-hour interval, and the daily  
 125 composite sample observation (when available).

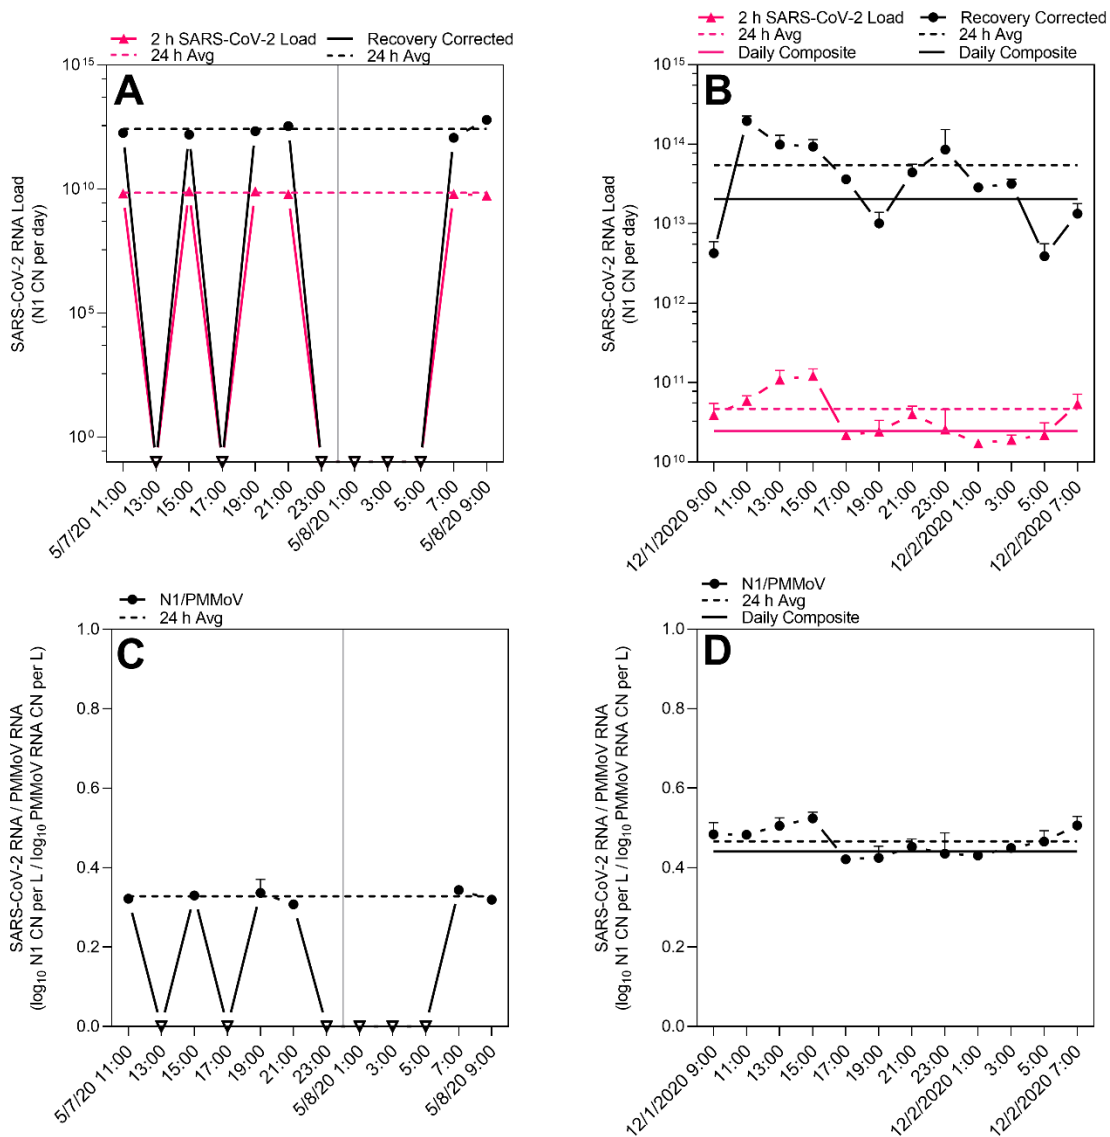

126

127 Figure S14 | WWTP B primary influent characteristics as measured during two 24-hour sampling  
 128 events: influent SARS-CoV-2 loading, copy number (CN) per day (concentration x flow), with and  
 129 without recovery adjustment (A & B), and the ratio of the log<sub>10</sub> SARS-CoV-2 RNA copy number  
 130 per liter to log<sub>10</sub> PMMoV RNA copy number per liter (C & D). Data displayed include the  
 131 observations in serial grab samples, the average observed over the 24-hour interval, and the daily  
 132 composite sample observation (when available).

133



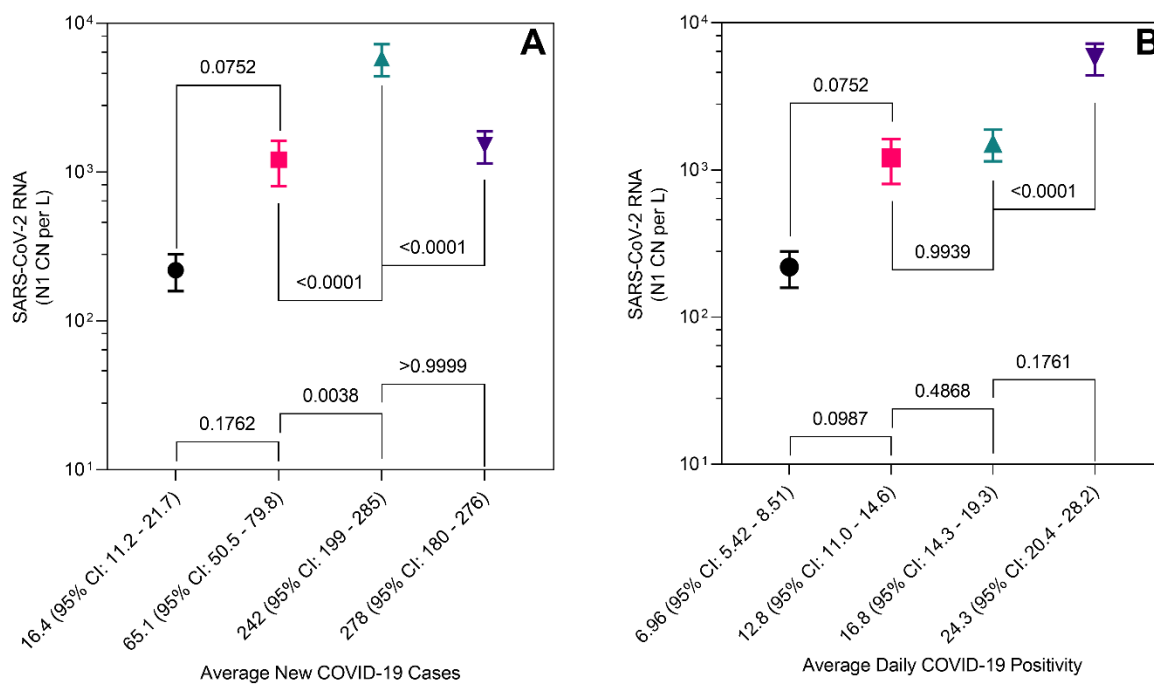

134 Figure S15 | SARS-CoV-2 RNA N1 concentrations, copy number (CN) per liter, in primary influent  
 135 stratified by ordinal arrangement of average daily COVID-19 cases (A) and average daily COVID-  
 136 19 positivity (B). Clinical averages and confidence intervals are calculated for the two weeks prior  
 137 to the 24-hour primary influent sampling period.
